# Supplementary material for: Characterization of the substrate binding site of an iron detoxifying membrane transporter from Plasmodium falciparum
Source: Springer Nature journal article supplement (doi:10.1186/s12936-021-03827-7), 2021-06-30
Supplement: MOESM1 [file 19315832]

5'-ATGCATAATTTGGATAAGGATAATTTGAAGACTATCATCTTCGGTTCCTTAGATGGT  
ATTATTACAATTTTTGCTATTGTTTCAGGTTGTGTTGGTGCAAAGATCACTCCAACAC  
AAGTTATTATCATCGGTATCGGTAATTTGTTTCGCTAACGCAATCTCTATGGGTTTTTC  
AGAATACACTTCTTCAACAGCTCAAAGAGATTTTCATGTTGGCAGAAAAGAAAAGAGA  
AGAATGGGAAATCGAAAAGTCCATCTGAAGAAAAGCAAGAAATGATCGATATCTA  
TATGAATAAGTACAAGTTCGATTGAGAAGATGCTAGAAATTTGGTTGAAATCACTTTT  
AGAAATAAGAATTTCTTTTTGGAACATATGATGTCTGAAGAATTGGGTTTAATCGTTA  
CAAACGAAGATAAGAACGAATGTTTGAAGAAAGGTATTATTATGTTTTTATCTTTTGC  
AGTTTTTGGTATTATTCCATTGTCAGCTTATGTTGCATACACTGTTTTCTTTGGTTACA  
CAGATTACACTACATCATTTTTTGGTTGTTTTTATTTCAACTTTGACTACATTGTTTATTT  
TGGGTTTGTAAATCTCAATTCACTAACCAAAAGCCAATCACATGTGCTTTGTACAT  
GGTTTTGAATGGTATGATTGCTGGTATGGTTCCATTTTTGTTAGGTGTTGTTTTGAAA  
ATAACATCTCTGAATTAGTTCCAAGAGGTTCTTCAAATTTGGGTCCAGAACAAAAAT  
TAATTTGAGAAGAAGATTTGAACTCTGCTGTTGACCACCACCATCACCATCATCACCA  
TCACCATTGA-3'

**Figure S1:** Nucleotide sequence of the PfvIT N-terminal truncation construct used in this study. The construct was codon optimized for expression in *Saccharomyces cerevisiae*.
