# Supplementary material for: Characterization of the substrate binding site of an iron detoxifying membrane transporter from Plasmodium falciparum
Source: Springer Nature journal article supplement (doi:10.1186/s12936-021-03827-7), 2021-06-30
Supplement: MOESM2 [file 19315832]

**Table S1:** DNA oligonucleotide primers used in the study.

| Primer name | Oligonucleotide sequence (5'-3')                                          | Primer length (mer) |
|-------------|---------------------------------------------------------------------------|---------------------|
| E113A       | F: ggacagtttcgatttccattcagctcttttctttctgccaacatg                          | 48                  |
|             | R: catgttggcagaaaagaaaagagctgaatgggaaatcgaaaactgtcc                       | 48                  |
| E113Q       | F: cagtttcgatttccattcttcttttctttctgccaacatg                               | 45                  |
|             | R: catgttggcagaaaagaaaagacaagaatgggaaatcgaaaactg                          | 45                  |
| E116A       | F: ttctcagatggacagtttcgatagcccattcttcttttctttctg                          | 50                  |
|             | R: cagaaaagaaaagagaagaatgggctatcgaaaactgtccatctgaagaa                     | 50                  |
| E116Q       | F: cagatggacagtttcgatttccattcttcttttctttc                                 | 43                  |
|             | R: gaaaagaaaagagaagaatggcaaatcgaaaactgtccatctg                            | 43                  |
| E124A       | F: tatagatatcgatcatttcttgcttagcttcagatggacagtttcgatttc                    | 52                  |
|             | R: gaaatcgaaaactgtccatctgaagctaagcaagaaatgatcgatatctata                   | 52                  |
| E124Q       | F: gatatcgatcatttcttgctttgttcagatggacagtttcgattt                          | 47                  |
|             | R: aaatcgaaaactgtccatctgaacaaaagcaagaaatgatcgatc                          | 47                  |
| E127A       | F: gtactattcatatagatatcgatcatagcttgcttttcttcagatggacagttt                 | 56                  |
|             | R: aaaactgtccatctgaagaaaagcaagctatgatcgatatctatatgaataagtac               | 56                  |
| E127Q       | F: attcatatagatatcgatcatttgttgcttttcttcagatggacagt                        | 47                  |
|             | R: actgtccatctgaagaaaagcaacaaatgatcgatatctatatgaat                        | 47                  |
| E165A       | F: cttcgtttgtaacgattaaacccaagcttcagacatcatatgttccaaaa                     | 52                  |
|             | R: ttttggacatgatgtctgaagcttgggttaatcgttacaacgaag                          | 52                  |
| E165Q       | F: gtttgtaacgattaaacccaattgttcagacatcatatgttccaaaa                        | 47                  |
|             | R: ttttggacatgatgtctgaacaattgggttaatcgttacaac                             | 47                  |
| M161A       | F: attaaacccaattcttcagacatagcatgttccaaaaagaaattcttatttctaaaagtgattcaacca  | 70                  |
|             | R: tgggtgaaatcacttttagaaataagaattcttttggacatgctatgtctgaagaattgggttaat     | 70                  |
| M161L       | F: taaacccaattcttcagacatcaaatgttccaaaaagaaattcttatttctaaaagt              | 57                  |
|             | R: acttttagaaataagaattcttttggacattgatgtctgaagaattgggtta                   | 57                  |
| M161C       | F: attaaacccaattcttcagacatacaaatgttccaaaaagaaattcttatttctaaaagtgattcaacca | 70                  |
|             | R: tgggtgaaatcacttttagaaataagaattcttttggacattgatgtctgaagaattgggttaat      | 70                  |

|       |                                                                                |    |
|-------|--------------------------------------------------------------------------------|----|
| M161E | <b>F:</b> attaaaccaattcttcagacattcatgttccaaaaagaaattcttatttctaaaagtgattcaacca  | 70 |
|       | <b>R:</b> tggttgaaatcaccttttagaaataagaatttcttttggacatgaaatgtctgaagaattgggttaat | 70 |
| M162A | <b>F:</b> ttcgttgtaacgattaaaccaattcttcagaagccatatgttccaaaaagaaattcttatttctaaa  | 69 |
|       | <b>R:</b> tttagaaataagaatttcttttggacatatggcttctgaagaattgggttaatcgttacaacgaa    | 69 |
