# Supplementary material for: Characterization of the substrate binding site of an iron detoxifying membrane transporter from Plasmodium falciparum
Source: Springer Nature journal article supplement (doi:10.1186/s12936-021-03827-7), 2021-06-30
Supplement: MOESM4 [file 19315832]

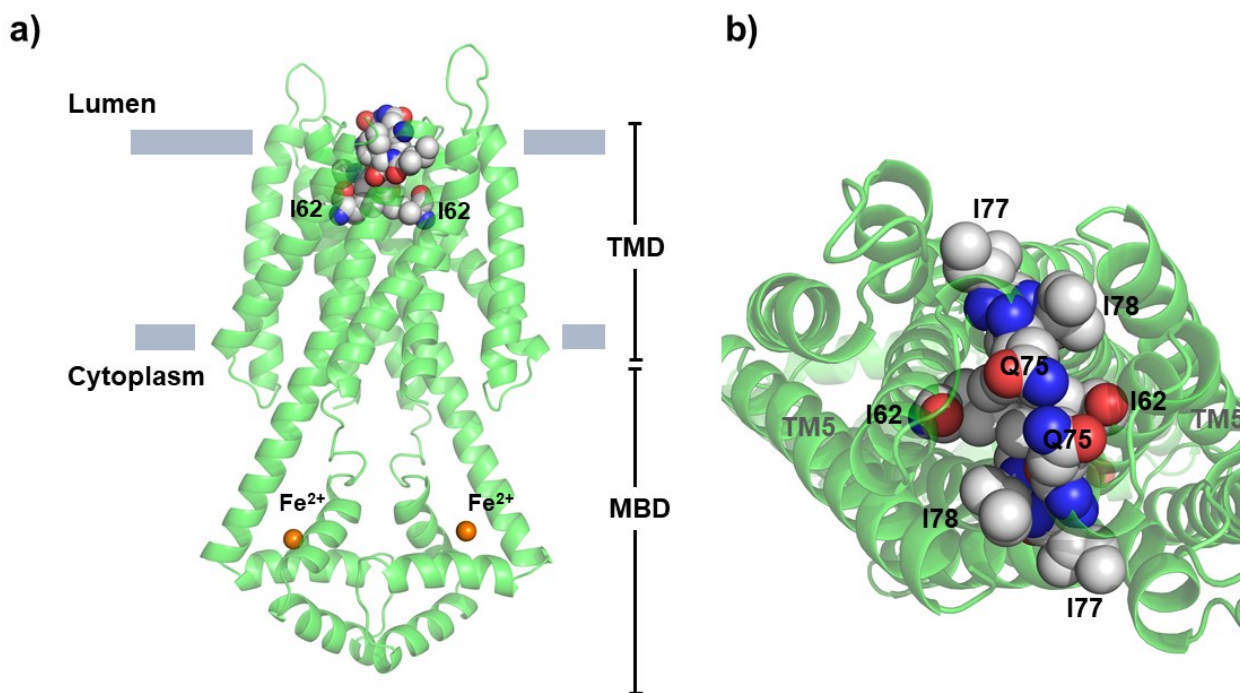

**Figure S3:** Structural model of the functional PfVIT homodimer in an 'inward open' conformation and with  $\text{Fe}^{2+}$  substrate bound. **(a)** PfVIT homodimer as viewed in the plane of the membrane. Amino acid residues that form the 'plug' in the substrate translocation pore at the luminal side of the transmembrane domain (TMD) are represented in spacefill with oxygen atoms coloured red and nitrogen atoms coloured blue.  $\text{Fe}^{2+}$  ions bound to the cytoplasmic metal binding domain (MBD) of each PfVIT protomer are depicted as orange spheres. **(b)** The structural model viewed from the luminal side of the membrane with amino acid residues that form the 'plug' represented in spacefill with oxygen atoms coloured red and nitrogen atoms coloured blue. For clarity, this view of the model was magnified x2.
